# Supplementary material for: Considering the base rates of low performance in cognitively healthy older adults improves the accuracy to identify neurocognitive impairment with the Consortium to Establish a Registry for Alzheimer’s Disease-Neuropsychological Assessment Battery (CERAD-NAB)
Source: PubMed Central journal article supplement (PMC4464368; doi:10.1007/s00406-014-0571-z), 2015-01-03
Supplement: 406_2014_571_MOESM1_ESM.pdf [file 406_2014_571_MOESM1_ESM.pdf]

**Electronic Supplementary Material 1 – Summary of overall CERAD-NAB test performance (raw scores)**

**European Archives of Psychiatry and Clinical Neuroscience**

**Considering the base rates of low performance in cognitively healthy older adults improves the accuracy to identify neurocognitive impairment with the Consortium to Establish a Registry for Alzheimer's Disease-Neuropsychological Assessment Battery (CERAD-NAB)**

Panagiota Mistridis<sup>1,2</sup>, Simone C. Egli<sup>1,2</sup>, Grant L. Iverson<sup>3,4</sup>, Manfred Berres<sup>5</sup>, Klaus Willmes<sup>6</sup>, Kathleen A. Welsh-Bohmer<sup>7</sup>, Andreas U. Monsch<sup>1,2\*</sup>

<sup>1</sup> Memory Clinic, Felix Platter Hospital, University Center for Medicine of Aging Basel, Schanzenstrasse 55, 4031 Basel, Switzerland

<sup>2</sup> University of Basel, Department of Psychology, Missionsstrasse 60/62, 4055 Basel, Switzerland

<sup>3</sup> Department of Physical Medicine and Rehabilitation, Harvard Medical School

<sup>4</sup> Red Sox Foundation and Massachusetts General Hospital Home Base Program, Boston, MA 02114, USA

<sup>5</sup> Department of Mathematics and Technology, University of Applied Sciences Koblenz, Joseph-Rovan-Allee 2, 53424 Remagen, Germany

<sup>6</sup> Section Neuropsychology, Department of Neurology, RWTH Aachen University, Pauwelsstraße 30, 52074 Aachen, Germany

<sup>7</sup> Joseph and Kathleen Bryan Alzheimer's Disease Center, Duke University, 2200W Main Street, Suite A200, Durham NC 27705, USA

\*Correspondence concerning this article should be addressed to:

Andreas U. Monsch, Memory Clinic, Felix Platter Hospital, University Center for Medicine of Aging Basel, Schanzenstrasse 55, 4031 Basel, Switzerland

Phone: +41 61 265 31 93

Fax: +41 61 265 37 94

E-Mail: [Andreas.Monsch@unibas.ch](mailto:Andreas.Monsch@unibas.ch)

**Table S1** Descriptive statistics for the raw scores of the 10 CERAD-NAB<sup>a</sup> [21, 22] measures ( $N = 1,081$ )

|                                        | <i>M (SD)</i> | Median | IQR <sup>b</sup> |
|----------------------------------------|---------------|--------|------------------|
| Verbal Fluency                         | 21.4 (5.6)    | 21.0   | 8.0 (17, 25)     |
| Boston Naming Test [15]                | 14.0 (1.1)    | 14.0   | 2.0 (15, 13)     |
| Word list - Encoding [30]              | 20.5 (3.6)    | 21.0   | 5.0 (23, 18)     |
| Word list - Delayed Recall [10]        | 7.0 (2.0)     | 7.0    | 2.0 (6, 8)       |
| Word list - Discriminability (%) [100] | 96.9 (4.9)    | 100.0  | 5.0 (95, 100)    |
| Word list - Savings (%)                | 85.9 (19.9)   | 87.5   | 25.0 (75, 100)   |
| Word List - Intrusion Errors           | 0.7 (1.3)     | 0.0    | 1.0 (0, 1)       |
| Figures - Copy [11]                    | 10.3 (0.9)    | 11.0   | 1.0 (10, 11)     |
| Figures - Delayed Recall [11]          | 8.9 (2.1)     | 10.0   | 4.0 (7, 11)      |
| Figures - Savings (%)                  | 85.7 (19.4)   | 91.9   | 28.3 (72.7, 100) |

Maximal scores are given in square brackets

<sup>a</sup> CERAD-NAB = Consortium to Establish a Registry for Alzheimer's Disease-Neuropsychological Assessment Battery

<sup>b</sup> IQR = interquartile range
