# Supplementary material for: Considering the base rates of low performance in cognitively healthy older adults improves the accuracy to identify neurocognitive impairment with the Consortium to Establish a Registry for Alzheimer’s Disease-Neuropsychological Assessment Battery (CERAD-NAB)
Source: PubMed Central journal article supplement (PMC4464368; doi:10.1007/s00406-014-0571-z), 2015-01-03
Supplement: 406_2014_571_MOESM3_ESM.pdf [file 406_2014_571_MOESM3_ESM.pdf]

**Electronic Supplementary Material 3 – Base rates for 20 operational criteria for probable cognitive impairment**

**European Archives of Psychiatry and Clinical Neuroscience**

**Considering the base rates of low performance in cognitively healthy older adults improves the accuracy to identify neurocognitive impairment with the Consortium to Establish a Registry for Alzheimer's Disease-Neuropsychological Assessment Battery (CERAD-NAB)**

Panagiota Mistridis<sup>1,2</sup>, Simone C. Egli<sup>1,2</sup>, Grant L. Iverson<sup>3,4</sup>, Manfred Berres<sup>5</sup>, Klaus Willmes<sup>6</sup>, Kathleen A. Welsh-Bohmer<sup>7</sup>, Andreas U. Monsch<sup>1,2\*</sup>

<sup>1</sup> Memory Clinic, Felix Platter Hospital, University Center for Medicine of Aging Basel, Schanzenstrasse 55, 4031 Basel, Switzerland

<sup>2</sup> University of Basel, Department of Psychology, Missionsstrasse 60/62, 4055 Basel, Switzerland

<sup>3</sup> Department of Physical Medicine and Rehabilitation, Harvard Medical School

<sup>4</sup> Red Sox Foundation and Massachusetts General Hospital Home Base Program, Boston, MA 02114, USA

<sup>5</sup> Department of Mathematics and Technology, University of Applied Sciences Koblenz, Joseph-Rovan-Allee 2, 53424 Remagen, Germany

<sup>6</sup> Section Neuropsychology, Department of Neurology, RWTH Aachen University, Pauwelsstraße 30, 52074 Aachen, Germany

<sup>7</sup> Joseph and Kathleen Bryan Alzheimer's Disease Center, Duke University, 2200W Main Street, Suite A200, Durham NC 27705, USA

\*Correspondence concerning this article should be addressed to:

Andreas U. Monsch, Memory Clinic, Felix Platter Hospital, University Center for Medicine of Aging Basel, Schanzenstrasse 55, 4031 Basel, Switzerland

Phone: +41 61 265 31 93

Fax: +41 61 265 37 94

E-Mail: [Andreas.Monsch@unibas.ch](mailto:Andreas.Monsch@unibas.ch)

**Table S3** Base rates for 20 operational criteria for probable cognitive impairment on the CERAD-NAB<sup>a</sup> [1,2]

| Criterion number                                           | Criterion for cognitive impairment: Based on 10 Scores         | Base rates                              |                                        |                                        |
|------------------------------------------------------------|----------------------------------------------------------------|-----------------------------------------|----------------------------------------|----------------------------------------|
|                                                            |                                                                | normative sample<br>( <i>N</i> = 1,081) | NC-NC <sup>c</sup><br>( <i>n</i> = 26) | NC-AD <sup>d</sup><br>( <i>n</i> = 26) |
| 1                                                          | ≤ 25th percentile: 6 or more scores                            | 11.9 %                                  | 7.7 %                                  | 34.6 %                                 |
| 2                                                          | ≤ 16 <sup>th</sup> percentile: 5 or more scores                | 9.3 %                                   | 0 %                                    | 23.1 %                                 |
| 3                                                          | ≤ 10th percentile: 4 or more scores                            | 9.5 %                                   | 3.8 %                                  | 23.1 %                                 |
| 4                                                          | ≤ 7th percentile: 3 or more scores                             | 11.2 %                                  | 11.5 %                                 | 23.1 %                                 |
| 5                                                          | ≤ 2.5th percentile: 2 or more scores                           | 8.5 %                                   | 3.8 %                                  | 11.5 %                                 |
| 6                                                          | ≤ 1st percentile: 1 or more scores                             | 10.1 %                                  | 3.8 %                                  | 15.4 %                                 |
| 7                                                          | Criteria 1-6 simultaneously: 1 or more                         | 22.0 %                                  | 19.2 %                                 | 53.8 %                                 |
| 8                                                          | Criteria 1-6 simultaneously: 2 or more                         | 13.8 %                                  | 7.7 %                                  | 26.9 %                                 |
| 9                                                          | Criteria #1 OR #4                                              | 16.0 %                                  | 15.4 %                                 | 42.3 %                                 |
| <b>Criterion for memory impairment: Based on 7 Scores</b>  |                                                                |                                         |                                        |                                        |
| 10                                                         | ≤ 25th percentile: 5 or more scores                            | 11.0 %                                  | 3.8 %                                  | 38.5 %                                 |
| 11                                                         | ≤ 16th percentile: 4 or more scores                            | 10.5 %                                  | 7.7 %                                  | 26.9 %                                 |
| 12                                                         | ≤ 10th percentile: 3 or more scores                            | 11.2 %                                  | 7.7 %                                  | 23.1 %                                 |
| 13                                                         | ≤ 7th percentile: 3 or more scores                             | 7.1 %                                   | 7.7 %                                  | 15.4 %                                 |
| 14                                                         | ≤ 2.5th percentile: 2 or more scores                           | 6.8 %                                   | 0.0 %                                  | 11.5 %                                 |
| 15                                                         | ≤ 1st percentile: 1 or more scores                             | 7.7 %                                   | 0.0 %                                  | 11.5 %                                 |
| 16                                                         | Criteria 1-6 simultaneously: 1 or more                         | 19.3 %                                  | 7.7 %                                  | 46.2 %                                 |
| 17                                                         | Criteria 1-6 simultaneously: 2 or more                         | 12.6 %                                  | 7.7 %                                  | 30.8 %                                 |
| 18                                                         | Criteria #10 OR #13                                            | 13.0 %                                  | 7.7 %                                  | 42.3 %                                 |
| <b>Combined criteria for probable cognitive impairment</b> |                                                                |                                         |                                        |                                        |
| 19                                                         | (Verbal Fluency OR BNT <sup>b</sup> ≤ 16th percentile) AND #16 | 6.1%                                    | 0.0%                                   | 7.7%                                   |
| 20                                                         | Figures Copy ≤ 16th percentile AND #16                         | 3.1                                     | 0.0%                                   | 11.5%                                  |

The base rates for each criterion (1-20) are provided for the normative sample and for two subgroups (NC–NC, NC–AD) with known future outcomes. If a single criterion is applied in research or in clinical practice, then the

associated base rate is accurate (e.g., #13 = 7.1 % in the normative sample). However, if multiple criteria are applied simultaneously, the base rates increase (e.g., see #7 and #16)

<sup>a</sup> CERAD-NAB = Consortium to Establish a Registry for Alzheimer's Disease-Neuropsychological Assessment Battery

<sup>b</sup> BNT = Boston Naming Test

<sup>c</sup> NC-NC = cognitively healthy participants who remained healthy

<sup>d</sup> NC-AD = initially healthy participants who progressed to Alzheimer's disease dementia
